# Supplementary material for: Bifidobacterium longum K5 Prevents Enterohaemorrhagic Escherichia coli O157:H7 Infection in Mice through the Modulation of the Gut Microbiota
Source: MDPI journal article supplement (doi:10.3390/nu16081164), 2024-04-13
Supplement: s1 [file s1]

# Supplementary Materials

Table S1: Disease Activity Index (DAI) Scoring System

| Score | weight loss (%) | stool consistency | occult/gross bleeding |
|-------|-----------------|-------------------|-----------------------|
| 0     | none            | normal            | normal                |
| 1     | 0-5             |                   |                       |
| 2     | 5-10            | loose stools      | hemoccult positive    |
| 3     | 10-20           |                   |                       |
| 4     | > 20            | diarrhea          | gross bleeding        |

**Table S2: Histopathological Scoring System**

| Score | inflammatory infiltrate | mucosal damage       | crypt damage                                    |
|-------|-------------------------|----------------------|-------------------------------------------------|
| 0     | none                    | none                 | none                                            |
| 1     | mild                    | mucosa               | 1/3 damaged                                     |
| 2     | moderate                | mucosa and submucosa | 2/3 damaged                                     |
| 3     | severe                  | transmural           | crypt loss, but surface<br>epithelium present   |
| 4     |                         |                      | Both crypt and surface<br>epithelium were lost. |

**Table S3: Primer Sequences for RT-qPCR Assays in Colonic Tissue**

| Gene      | Forward (5'–3')           | Reverse (5'–3')          |
|-----------|---------------------------|--------------------------|
| Muc2      | CGAGCACATCACCTACCACATCATC | TCCAGAATCCAGCCAGCCAGTC   |
| ZO-1      | AACCCGAAACTGATGCTGTGGATAG | CGCCCTTGGAATGTATGTGGAGAG |
| Occludin  | TTGGCTACGGAGGTGGCTATGG    | CCTTTGGCTGCTCTTGGGTCTG   |
| Claudin-1 | GCTGGGTTTCATCCTGGCTTCTC   | CCTGAGCGGTCACGATGTTGTC   |
| Stx1A     | CCATTCTGGCAACTCGCG        | GGCAAGAGCGATGTTACGGT     |
| Stx2A     | TTGCTGTGGATATACGAGGGC     | TCCGTTGTCATGGAAACCG      |
| Gapdh     | GACAGCCGCATCTTCTTGTG      | AATCCGTTACACCGACCTT      |
